# Supplementary material for: Predictive Value of Novel Inflammation-Based Biomarkers for Pulmonary Hypertension in the Acute Exacerbation of Chronic Obstructive Pulmonary Disease
Source: Anal Cell Pathol (Amst). 2019 Oct 14;2019:5189165. doi: 10.1155/2019/5189165 (PMC6815641; doi:10.1155/2019/5189165)
Supplement: Supplementary Materials — Patients diagnosed with AECOPD (n = 185) were registered in this retrospective study. All patients evaluated for PH in our study underwent Doppler echocardiography and were divided into study and control groups depending on whether they also had PH. 101 AECOPD patients with PH were included in the PAH group, and the remaining eighty-four patients were assigned to the COPD group. Clinical characteristics and baseline laboratory tests (routine blood test (RBT), blood gas analysis, and amino terminal pro-B-type natriuretic peptide (NT-proBNP)) were tested at enrollment. All these data were listed in the supplementary file. There are some things particularly revelatory here: (1) in the gender column, 1 is for male and 2 is for female; (2) in the Respiratory failure, Hypertension, and Diabetes columns, 1 is for no and 2 is for yes; (3) BMI is defined as a person's weight in kilograms divided by the square of the height in meters (kg/m2); (4) the definition of the smoking index is the average root number per day multiplied by years of smoking; (5) inflammatory indices were calculated as follows: NLR = neutrophil counts/lymphocyte counts; PLR = platelet counts/lymphocyte counts; SII = platelet counts × neutrophil counts/lymphocyte counts; (6) abbreviations: LAD—left atrium diameter; LVDD—left ventricular end diastolic diameter; RAD—right atrium diameter; RVD—right ventricular diameter; PTRV—peak tricuspid regurgitation velocity; AECOPD—acute exacerbation of chronic obstructive pulmonary disease; PH—pulmonary hypertension; BMI—body mass index; WBC—white blood cell; RBC—red blood cell; NLR—neutrophil-to-lymphocyte ratio; PLR—platelet-to-lymphocyte ratio; SII—systemic-immune-inflammation index; PaCO2—partial pressure of carbon dioxide; HCO3−—bicarbonate ion; Lac—lactic acid; PASP—pulmonary arterial systolic pressure; PaCO2—partial pressure of carbon dioxide; HCO3−—bicarbonate ion; NLR—neutrophil-to-lymphocyte ratio; PLR—platelet-to-lymphocyte ratio; SII—systemic-immune-inflam [file 5189165.f1.xlsx]

## Sheet: Sheet1
Hospital number	Name	Sex	Group	Respiratory failure	Hypertension	Diabetes	Hospital stay	Age	Smoking index	Course of disease	BMI	Height	Weight	WBC	RBC	Hb	Neutrophils	Lymphocytes	Monocytes	Platelets	Albumin	NLR	PLR	SIRI	SII	PNI	NT-PROBNP	PH	PaO2	PaCO2	HCO3-	Lac	D-Dimer	Fibrinogen	PASP	LAD	LVDD	RAD	RVD	LVEF	PTRV
201708839	张鹏	1	copd	2	1	1	8	79	1200	20	28.3447	1.68	80	4.41	4.13	129	2.72	1.2	0.35	181	33.4	2.26667	150.833	0.793333	410.267	39.4	84	7.415	55.3	42.6	27.3	1.6	3.63	5.12	NA	20	47	38	21	66
201718933	朱洪香	1	copd	1	2	1	9	63	500	5	32.526	1.7	94	8.36	5.18	155	4.57	1.89	0.72	145	39.6	2.41799	76.7196	1.74095	350.608	49.05	54	7.446	74.5	41.8	28.7	1.4	0.32	3.02	NA	28	48	35	18	65
201770333	徐美杨	1	copd	2	2	1	18	76	800	10	30.4867	1.65	83	6.55	4.87	133	4.65	1.25	0.45	198	39.1	3.72	158.4	1.674	736.56	45.35	141	7.348	79.6	50.9	28	1.6	0.91	4.68	NA	26	49	34	18	68
201776557	高菊	2	copd	2	1	1	9	60	0.0001	30	23.3355	1.63	62	13.03	5.13	152	10.53	1.32	0.9	223	45.3	7.97727	168.939	7.17955	1778.93	51.9	43	7.412	49.3	47.5	30.2	1.5	0.26	5.92	NA	26	41	18	17	69
201778125	张绍龙	1	copd	1	2	1	6	76	600	8	29.7578	1.7	86	8.72	4.83	143	5.69	2.35	0.53	255	36.2	2.42128	108.511	1.28328	617.426	47.95	136	7.411	196	48.6	30.8	2	0.74	4.03	NA	28	43	29	17	68
201779549	刘志地	1	copd	1	1	1	3	63	600	10	24.3865	1.62	64	8.49	4.87	157	6.02	1.36	0.48	176	40.5	4.42647	129.412	2.12471	779.059	47.3	28	7.435	67.4	43.8	29.4	1.2	0.38	3.96	NA	27	39	33	19	67
201780242	万跃庭	1	copd	1	2	1	8	73	1000	20	22.4913	1.7	65	4.9	5.86	121	3.74	0.6	0.54	189	32.6	6.23333	315	3.366	1178.1	35.6	193	7.473	68.9	38.3	28	0.6	1.81	4.1	NA	26	46	31	18	64
201782606	李庭广	1	copd	1	2	1	11	63	800	10	23.4375	1.6	60	5.5	4.65	137	3.61	1.16	0.55	261	40.6	3.11207	225	1.71164	812.25	46.4	86	7.375	82.7	47.1	27.5	1	0.2	3.47	NA	31	43	35	16	68
201797295	刘翠兰	2	copd	2	2	2	12	74	0.0001	10	31.2175	1.55	75	8.48	4.4	110	6.93	1	0.52	356	36.2	6.93	356	3.6036	2467.08	41.2	291	7.289	89.4	75.1	36	1.6	2.09	9.13	NA	26	38	27	18	66
201800829	王武松	1	copd	1	2	1	7	73	800	10	26.2976	1.7	76	6.2	5.16	161	4.45	1.09	0.49	158	39.6	4.08257	144.954	2.00046	645.046	45.05	45	7.372	171	46.4	26.9	1.7	0.34	3.31	NA	27	47	27	19	69
201800902	裴秀英	2	copd	2	1	1	10	63	0.0001	20	33.2031	1.6	85	7.45	4.74	134	5.92	1.02	0.4	234	48.2	5.80392	229.412	2.32157	1358.12	53.3	253	7.367	48.4	50.2	28.8	2.2	0.27	3.92	NA	29	43	32	17	66
201804151	蔡增兵	1	copd	1	2	1	11	71	600	10	25.7117	1.65	70	7.54	5.23	155	5.53	1.42	0.51	283	38.1	3.89437	199.296	1.98613	1102.11	45.2	33	7.444	133	41.4	28.3	1.4	0.6	3.47	NA	27	43	32	17	65
201805093	李三龙	1	copd	2	1	2	8	66	500	50	24.4898	1.75	75	11.33	4.28	134	9.8	0.7	0.79	242	42	14	345.714	11.06	3388	45.5	131	7.365	88.1	63	36	1.2	0.42	5.02	NA	28	46	28	18	60
201806303	郑付	1	copd	1	1	1	4	78	800	10	20.7612	1.7	60	6.76	3.88	108	4.62	1.62	0.48	319	35.7	2.85185	196.914	1.36889	909.741	43.8	152	7.439	61.9	42.3	28.6	1	0.55	6.02	NA	24	36	28	16	62
201806309	丁祖国	1	copd	2	2	1	10	65	500	10	19.0311	1.7	55	5.39	6.2	193	4.45	0.56	0.29	163	35.6	7.94643	291.071	2.30446	1295.27	38.4	99	7.409	54.6	70.8	44.8	1.7	0.01	3.96	NA	27	45	30	19	68
201807634	刘兆英	2	copd	1	1	1	8	73	0.0001	10	16.6493	1.55	40	6.45	3.76	107	4.81	1.42	0.2	514	37.6	3.38732	361.972	0.677465	1741.08	44.7	300	7.457	61.2	40.3	28.4	0.9	0.72	7.07	NA	23	39	29	17	68
201807639	张尔云	1	copd	2	1	1	8	56	800	20	21.9713	1.72	65	7.2	5.05	153	6.41	0.55	0.21	273	43	11.6545	496.364	2.44745	3181.69	45.75	948	7.44	59.2	41.2	28	1.9	0.35	3.6	NA	27	40	25	14	65
201812724	叶春波	1	copd	2	1	1	10	70	800	10	21.9713	1.72	65	15.1	4.6	134	13.75	1.02	0.33	158	34.7	13.4804	154.902	4.44853	2129.9	39.8	543	7.491	60.8	43.9	33.5	1	0.44	2.86	NA	36	51	34	18	68
201813054	孙兰英	2	copd	2	2	1	11	63	0.0001	10	24.974	1.55	60	7.98	5.8	174	6.15	1.12	0.61	204	35.7	5.49107	182.143	3.34955	1120.18	41.3	39	7.356	61.9	66.4	37.2	1.3	0.59	6.17	NA	23	42	34	17	61
201813435	盛友兰	2	copd	2	1	1	12	67	0.0001	6	25.3906	1.6	65	10.79	4.42	134	9.62	0.97	0.18	186	34.4	9.91753	191.753	1.78515	1844.66	39.25	98	7.481	89	31.5	23.5	2.5	0.57	6.1	NA	27	38	38	17	67
201814608	朱名华	1	copd	1	1	1	13	64	900	10	23.8895	1.76	74	8.66	5.34	162	5.69	2.1	0.66	102	37.8	2.70952	48.5714	1.78829	276.371	48.3	86	7.422	63.6	38.7	25.2	0.8	0.45	3.08	NA	30	48	33	18	63
201819122	郎玉华	1	copd	1	2	1	7	73	600	10	23.4375	1.6	60	4.04	4.75	140	2.72	0.88	0.24	146	37	3.09091	165.909	0.741818	451.273	41.4	154	7.398	87.5	44.6	25.7	0.8	0.26	3.32	NA	31	44	38	15	68
201819835	孙兆余	1	copd	1	1	1	8	80	1000	10	24.6755	1.72	73	7.11	5	152	5.41	0.7	0.9	177	37	7.72857	252.857	6.95571	1367.96	40.5	336	7.468	62	38.5	27.9	1.1	0.21	3.65	NA	26	36	28	17	66
201821020	刘立兴	1	copd	1	1	1	18	84	200	30	22.8374	1.7	66	5.75	3.69	119	3.94	0.96	0.68	156	36.2	4.10417	162.5	2.79083	640.25	41	83	7.408	101	37.4	23.6	0.9	0.43	5.13	NA	29	46	34	16	68
201825413	陈兆生	1	copd	2	1	1	9	69	600	40	24.2215	1.7	70	9.92	4.81	138	8.27	1.17	0.44	137	35.4	7.06838	117.094	3.11009	968.368	41.25	215	7.382	72.8	67.4	40	1.8	0.55	4.29	NA	30	47	29	19	67
201826244	藏秀成	1	copd	1	2	1	6	72	700	10	24.8016	1.68	70	6.19	5.39	155	4.72	1.15	0.3	251	44.4	4.10435	218.261	1.2313	1030.19	50.15	153	7.446	74.9	36.1	24.8	2	0.21	3.24	NA	24	45	30	16	68
201828959	杨永梅	2	copd	1	1	1	9	78	200	10	33.3333	1.5	75	11.52	4.3	127	8.89	1.85	0.68	256	37.1	4.80541	138.378	3.26768	1230.18	46.35	147	7.473	174	45.3	33.2	1.1	0.93	6.31	NA	36	54	31	18	69
201833820	刘翠兰	2	copd	2	2	2	7	75	0.0001	10	23.8751	1.65	65	5.49	4.79	121	4.18	0.93	0.36	247	38.1	4.49462	265.591	1.61806	1110.17	42.75	75	7.413	73.8	46.8	29.8	1	0.26	3.51	NA	27	46	33	18	68
201838846	张玉宝	1	copd	1	1	1	5	67	400	10	19.7531	1.8	64	3.99	5.22	137	2.78	0.66	0.44	118	37.4	4.21212	178.788	1.85333	497.03	40.7	52	7.35	90.8	60	33.1	2.8	2.71	2.72	NA	27	42	33	16	67
201840016	郎玉华	1	copd	2	2	1	8	73	1000	10	21.875	1.6	56	9.38	4.82	130	8.64	0.45	0.24	148	43.4	19.2	328.889	4.608	2841.6	45.65	126	7.472	55.3	29.7	21.7	0.9	0.28	3.88	NA	25	42	35	18	65
201840631	赵春森	1	copd	2	1	1	15	73	600	30	24.2215	1.7	70	12.71	4.27	135	7.99	3.01	1.29	283	35.8	2.65449	94.0199	3.42429	751.219	50.85	98	7.421	65.3	45.9	29.8	1.8	0.42	4.1	NA	34	40	36	17	68
201840679	贾立山	1	copd	2	2	1	12	69	600	10	18.3655	1.65	50	4.79	4.35	129	3.46	0.85	0.44	116	44.8	4.07059	136.471	1.79106	472.188	49.05	216	7.312	117	54.4	29.5	2	0.42	4.24	NA	27	47	30	15	68
201841303	蔡玉霞	2	copd	1	2	1	8	53	0.0001	10	20	1.5	45	9.48	4.87	140	8.16	0.72	0.57	388	35.9	11.3333	538.889	6.46	4397.33	39.5	76	7.414	65	43.8	28	1.6	0.41	5.2	NA	28	44	33	17	68
201843781	赵金武	1	copd	2	1	1	6	73	800	20	23.1111	1.5	52	5.78	3.59	101	4.12	1.07	0.12	253	31.4	3.85047	236.449	0.462056	974.168	36.75	124	7.425	64.9	49.9	32.8	1.7	0.61	5.79	NA	32	45	34	16	68
201844852	尚正和	1	copd	1	1	1	6	68	300	10	23.1206	1.74	70	10.05	6.4	178	6.72	2.36	0.6	176	41.6	2.84746	74.5763	1.70847	501.153	53.4	133	7.401	66.8	46.9	27.2	1.4	0.25	2.83	NA	26	43	34	18	66
201846435	周桂香	2	copd	1	1	1	8	52	0.0001	40	14.6667	1.5	33	9.5	4.68	143	7.13	1.86	0.3	203	42.8	3.83333	109.14	1.15	778.167	52.1	31	7.429	70.3	50.1	33.2	0.7	0.31	3.88	NA	24	36	26	13	68
201846689	单成付	1	copd	1	1	2	2	65	3000	20	24.2215	1.7	70	5.83	4.55	137	3.61	1.78	0.38	201	45.6	2.02809	112.921	0.770674	407.646	54.5	38	7.415	65.2	41.9	26.8	2.1	0.33	2.61	NA	29	51	31	19	56
201847229	王立军	1	copd	1	1	1	15	58	600	5	24.8016	1.68	70	7.65	5.16	152	6.21	0.7	0.59	176	31	8.87143	251.429	5.23414	1561.37	34.5	124	7.416	72.7	42.8	27.5	1.1	0.6	6.72	NA	20	43	29	15	64
201849157	赵步兴	1	copd	1	1	1	13	63	800	8	19.5918	1.75	60	9.8	4.26	133	8.6	1.06	0.13	174	33.7	8.11321	164.151	1.05472	1411.7	39	238	7.411	65.3	38.2	24.2	1.9	0.27	4.63	NA	25	44	26	16	67
201849802	陈立新	1	copd	1	2	1	11	83	200	30	22.5306	1.75	69	7.27	3.09	104	5.34	0.7	0.57	208	37	7.62857	297.143	4.34829	1586.74	40.5	271	7.388	107	47.2	28.4	0.9	0.26	2.98	NA	32	53	32	18	68
201853050	许兆华	1	copd	1	1	1	9	78	800	10	21.3039	1.65	58	10.31	4.66	142	7.78	1.47	0.92	228	39.6	5.29252	155.102	4.86912	1206.69	46.95	72	7.401	54.9	46.1	28.6	2.6	0.35	3.74	NA	28	43	34	24	60
201854601	黄兆成	1	copd	1	1	1	9	66	800	10	18.5911	1.72	55	6.24	3.92	114	4.08	1.18	0.67	244	34.3	3.45763	206.78	2.31661	843.661	40.2	328	7.426	133	54.7	35.9	1.1	1.07	3.12	NA	28	44	31	16	68
201855584	侯秀华	1	copd	1	1	1	11	73	1000	20	23.03	1.68	65	7.24	3.89	121	5.74	0.82	0.57	167	35.3	7	203.659	3.99	1169	39.4	220	7.441	73.2	38	25.9	1	0.36	6.1	NA	24	42	30	18	68
201857266	应志胜	1	copd	2	2	2	10	71	1000	5	21.1073	1.7	61	4.42	4.23	126	2.67	1.4	0.25	202	33.5	1.90714	144.286	0.476786	385.243	40.5	302	7.423	56.8	42.2	27.5	1.6	0.28	3.12	NA	27	50	36	19	69
201868635	周明成	1	copd	1	1	1	7	72	0.0001	10	23.5294	1.7	68	12.33	4.64	134	10.15	0.94	0.85	271	34.3	10.7979	288.298	9.17819	2926.22	39	108	7.393	62	48.4	29.5	2.9	0.29	4.86	NA	29	45	26	16	66
201869603	耿树成	1	copd	2	1	1	7	60	500	20	22.8571	1.75	70	5.12	4.16	117	3.77	0.95	0.24	151	42.3	3.96842	158.947	0.952421	599.232	47.05	238	7.344	104	71.7	39	1.3	0.39	5.27	NA	28	45	28	18	70
201870499	王恒贵	1	copd	1	1	1	7	63	600	10	17.0392	1.57	42	7.8	3.82	114	5.76	1.25	0.75	213	39.4	4.608	170.4	3.456	981.504	45.65	73	7.437	68.4	45.6	30.7	1.6	0.4	5.16	NA	26	46	23	14	63
201872049	宋应功	1	copd	1	1	1	6	72	2000	5	23.4375	1.6	60	5.47	4.16	129	3.36	1.32	0.37	156	40.9	2.54545	118.182	0.941818	397.091	47.5	81	7.41	106	42.4	26.9	1	0.37	3.47	NA	24	47	28	16	68
201874304	张万才	1	copd	1	1	1	6	69	400	10	24.2215	1.7	70	11.59	4.46	135	8.73	2.14	0.66	120	39.1	4.07944	56.0748	2.69243	489.533	49.8	353	7.398	75	38.7	23.8	1.5	0.55	4.51	NA	25	46	30	19	66
201876511	周功华	1	copd	1	1	1	6	67	800	8	27.0416	1.72	80	10.14	5.12	149	6.74	2.35	0.73	252	38.6	2.86809	107.234	2.0937	722.757	50.35	61	7.402	67.3	46.7	29	1.2	0.39	5.84	NA	27	53	35	16	68
201878760	高申模	1	copd	1	2	2	9	74	1500	10	25.6055	1.7	74	7.15	4.98	148	5.01	1.51	0.43	206	43.1	3.31788	136.424	1.42669	683.483	50.65	133	7.43	77.6	40.9	27.1	1.7	0.63	3.56	NA	27	40	32	17	68
201882739	赵步兴	1	copd	1	1	1	14	64	600	5	20.0692	1.7	58	11.64	4.69	143	7.02	3.13	1.09	313	38.1	2.24281	100	2.44466	702	53.75	41	7.403	61.5	40	24.9	1.7	0.45	5.71	NA	24	44	27	17	68
201885637	李夕付	1	copd	2	2	2	8	82	200	5	25.9516	1.7	75	7.48	4.49	141	5.93	0.81	0.39	187	44.4	7.32099	230.864	2.85519	1369.02	48.45	169	7.379	182	61.6	36.3	1.5	0.22	3.88	NA	28	49	31	18	68
201885693	李延和	1	copd	1	2	1	6	64	400	30	14.6788	1.63	39	5.09	3.86	120	3.42	1.25	0.3	158	34.9	2.736	126.4	0.8208	432.288	41.15	463	7.459	100	37.3	26.5	0.9	1.22	4.47	NA	27	40	33	16	66
201888601	黄翠兰	2	copd	2	1	1	13	76	200	10	21.6441	1.55	52	5.63	4.87	138	3.61	1.45	0.41	179	43.6	2.48966	123.448	1.02076	445.648	50.85	125	7.378	53.5	60.5	35.6	1	0.24	4.58	NA	31	43	32	18	68
201889431	唐大才	1	copd	1	1	1	6	73	800	7	25.6544	1.64	69	8.39	5.47	160	5.39	2.05	0.67	211	42.2	2.62927	102.927	1.76161	554.776	52.45	247	7.449	70.8	42.2	29.2	1.8	0.39	4.24	NA	33	47	34	19	68
201901837	苗文美	1	cop d	2	2	1	9	76	1000	8	25.0593	1.73	75	5.73	4.39	127	4.45	0.86	0.34	91	41.5	5.17442	105.814	1.7593	470.872	45.8	230	7.377	104	50.1	29.4	1	0.26	2.35	NA	29	50	29	21	66
201902649	沈席兵	1	copd	1	1	1	11	81	1000	30	22.0386	1.65	60	9.39	4.63	146	6.41	1.7	1.11	255	37.9	3.77059	150	4.18535	961.5	46.4	359	7.443	70.2	35.5	24.3	0.8	0.61	5.73	NA	29	43	27	18	68
201902649	沈席兵	1	copd	1	1	1	11	81	600	30	22.0386	1.65	60	9.39	4.63	146	6.41	1.7	1.11	255	37.9	3.77059	150	4.18535	961.5	46.4	359	7.443	70.2	35.5	24.3	0.8	0.61	5.73	NA	29	43	27	18	68
201902720	刘美华	2	copd	1	2	1	13	80	0	30	18.3655	1.65	50	5.58	4.41	129	3.74	1.28	0.34	180	34.6	2.92188	140.625	0.993437	525.938	41	135	7.401	103	40.9	25.4	2	1.69	3.91	NA	38	43	36	16	68
2018101488	葛永林	1	copd	1	1	1	8	53	400	7	24.5089	1.69	70	10.42	5.1	159	6.73	2.83	0.71	138	46.7	2.37809	48.7633	1.68845	328.177	60.85	52	7.339	107	55.9	30.1	1	0.34	4.46	NA	27	43	32	16	68
2018101660	周士达	1	copd	1	1	1	7	79	1000	60	22.8374	1.7	66	6.2	4.58	145	4.02	1.23	0.46	194	42.8	3.26829	157.724	1.50341	634.049	48.95	48	7.458	74.6	47.8	33.8	1.4	0.22	4.38	NA	27	42	29	18	68
2018107460	曹础成	1	copd	1	1	2	7	72	800	5	24.4473	1.68	69	6.11	4.32	136	4.17	1.07	0.76	130	36.8	3.8972	121.495	2.96187	506.636	42.15	314	7.436	84.9	42.7	28.7	1.4	0.26	4.31	NA	28	46	30	18	68
2018107462	岳玉	2	copd	1	2	1	9	67	0.0001	10	26.2227	1.55	63	6.5	3.62	118	4.52	1.6	0.33	239	39.2	2.825	149.375	0.93225	675.175	47.2	196	7.465	96.5	38.7	27.9	1.5	0.31	3.72	NA	29	53	28	21	65
2018109206	徐永成	1	copd	2	1	1	5	64	800	15	18.3655	1.65	50	10.88	4.59	136	9.04	0.83	0.92	214	40	10.8916	257.831	10.0202	2330.8	44.15	48	7.412	97.7	51.5	32.7	1.2	0.43	6.26	NA	28	48	29	17	69
2018109445	陈明	1	copd	1	1	2	10	56	800	10	26.7036	1.72	79	5.58	4.3	134	4.88	0.63	0.05	193	33.9	7.74603	306.349	0.387302	1494.98	37.05	239	7.416	99.1	48.6	31.3	1.6	0.3	2.83	NA	28	43	25	16	67
2018110392	孙红军	1	copd	1	1	1	7	49	400	6	24.093	1.68	68	9.84	4.91	157	8.35	0.86	0.62	188	37.7	9.7093	218.605	6.01977	1825.35	42	28	7.408	70.1	53.2	33.5	2.7	0.35	3.51	NA	26	44	26	17	68
2018114288	张刚	1	copd	1	1	1	10	61	400	40	29.0174	1.65	79	7.79	4.53	136	6.18	1.08	0.5	127	39.4	5.72222	117.593	2.86111	726.722	44.8	57	7.408	78.1	49.4	31.1	2.1	0.25	4.8	NA	29	43	33	19	67
2019003429	杨化荣	2	copd	1	2	2	9	64	0.0001	10	30.2618	1.51	69	8.63	3.85	114	6.42	1.58	0.52	246	38.8	4.06329	155.696	2.11291	999.57	46.7	90	7.388	152	44.1	26.5	1.5	0.52	3.48	NA	23	40	31	15	68
2019003960	张兰英	2	copd	2	2	1	13	71	300	10	26.0375	1.58	65	8.79	4.25	126	6.07	1.57	1.01	202	38.3	3.86624	128.662	3.9049	780.981	46.15	2248	7.365	106	72.4	41.3	0.7	0.37	4.66	NA	30	46	26	19	65
2019006035	陈翠英	2	copd	1	1	1	17	64	0	20	25.3906	1.6	65	14.08	5.1	152	11.88	1.65	0.53	274	37.9	7.2	166.061	3.816	1972.8	46.15	179	7.435	69.6	42.1	28.3	1.9	0.39	3.23	NA	29	50	31	17	68
2019007387	尤桂清	2	cop d	1	2	2	6	87	0	50	22.8571	1.75	70	9.04	4.03	141	7.05	0.77	0.89	289	37.7	9.15584	375.325	8.1487	2646.04	41.55	716	7.459	67.8	42.4	30	1.8	0.4	5.34	NA	26	40	30	19	70
2019011360	张泉生	1	copd	1	2	1	4	71	0	5	22.8571	1.75	70	11.11	3.86	121	8.54	1.33	1.12	253	30.6	6.42105	190.226	7.19158	1624.53	37.25	111	7.478	124	38.5	28.5	0.9	1.86	8.64	NA	31	35	29	17	54
2019011633	朱士科	1	copd	2	2	1	9	67	1600	20	25.6055	1.7	74	5.44	3.84	124	3.75	0.97	0.45	196	34	3.86598	202.062	1.73969	757.732	38.85	114	7.337	48.3	59.8	32	2	0.8	8.79	NA	23	35	26	15	65
2019011655	郑玉凤	2	cop d	2	2	1	12	69	0	10	23.4375	1.6	60	11.77	3.86	108	8.89	1.39	1.48	123	34.8	6.39568	88.4892	9.46561	786.669	41.75	347	7.376	55.4	48.5	28.4	1.2	0.87	6.2	NA	23	44	30	19	65
2019015962	陈士杰	1	copd	1	2	1	10	82	500	10	22.719	1.57	56	8.14	4.63	137	6.07	1.35	0.45	199	39.5	4.4963	147.407	2.02333	894.763	46.25	88	7.402	70.4	42.3	21.6	1.26	0.36	4.38	NA	31	48	29	16	68
2019019450	高步兵	1	cop d	1	2	1	5	62	800	7	25.3444	1.65	69	6.85	5.09	151	4.19	2.01	0.5	220	42.1	2.08458	109.453	1.04229	458.607	52.15	39	7.44	84.6	36.6	24.8	1.5	0.22	2.83	NA	28	52	33	18	68
2019022666	朱志祥	1	copd	2	1	1	9	70	800	8	22.2291	1.71	65	16.72	4.21	130	13.83	1.5	1.22	360	37	9.22	240	11.2484	3319.2	44.5	225	7.402	56	50.4	31.3	1.5	0.28	4.95	NA	33	51	39	18	67
2019029018	李茂松	1	cop d	1	1	1	9	85	600	20	23.3067	1.67	65	7.23	4.01	129	4.49	2.08	0.5	257	35.4	2.15865	123.558	1.07933	554.774	45.8	109	7.423	68.6	46	30	1.4	1.74	5.95	NA	28	43	34	18	63
2019029381	蔡作桂	1	cop d	1	2	1	8	83	600	10	24.3141	1.66	67	14.18	4.46	142	12.48	1.02	0.59	147	42.8	12.2353	144.118	7.21882	1798.59	47.9	353	7.469	78.8	31	22.4	2	0.5	3.32	NA	28	41	37	18	62
2019029750	田素珍	2	copd	1	2	1	11	88	0	10	23.4375	1.6	60	12.02	3.75	113	10.21	1.03	0.68	356	34.7	9.91262	345.631	6.74058	3528.89	39.85	608	7.358	96.5	36.4	28	1.65	4.36	3.6	NA	25	36	29	16	68
2019032291	乔湘山	1	copd	1	2	1	7	65	600	8	25.6055	1.7	74	5.51	4.87	140	3.48	1.26	0.55	176	41.7	2.7619	139.683	1.51905	486.095	48	76	7.439	157	45.3	30.6	1.7	0.34	5.53	NA	26	47	33	16	68
2019038380	唐士明	1	cop d	1	1	1	4	83	1000	30	19.1001	1.65	52	5.83	4.2	128	3.63	1.35	0.46	182	37.3	2.68889	134.815	1.23689	489.378	44.05	171	7.435	69.1	42.6	28.6	1.2	0.47	4.77	NA	22	37	24	13	70
2019038606	沈克兰	2	copd	1	1	1	14	72	0	20	23.1473	1.61	60	10.95	4.57	129	8.18	2.01	0.48	215	43	4.06965	106.965	1.95343	874.975	53.05	180	7.385	79.3	41.5	24.8	1.8	0.24	4.57	NA	23	45	28	14	68
201811249	陈秀兰	2	pah	1	2	1	10	67	300	5	28.8044	1.57	71	6.79	3.82	116	5.42	1.03	0.32	181	34	5.26214	175.728	1.68388	952.447	39.15	980	7.377	106	43	25.3	1.8	0.87	3.63	36	24	42	32	14	65	2.8
201790660	郁文光	1	pah	2	2	1	10	53	1200	10	19.4674	1.65	53	19.97	5.63	183	16.85	1.51	1.3	165	41	11.1589	109.272	14.5066	1841.23	48.55	1183	7.468	47.5	54.8	39.7	1.4	0.53	5.14	36	22	46	39	21	68	2.83
201810359	蒋凤英	2	pah	1	2	1	17	74	200	17	24.2188	1.6	62	8.29	4.91	144	7.18	0.89	0.21	181	41.4	8.06742	203.371	1.69416	1460.2	45.85	1565	7.423	61	45.8	29.9	1.2	0.41	2.47	36	26	42	37	17	65	2.8
2019018578	徐兆龙	1	pa h	2	1	1	8	75	500	10	22.4913	1.7	65	8.21	3.54	121	6.94	0.42	0.83	115	28.9	16.5238	273.81	13.7148	1900.24	31	2399	7.392	72.5	53.6	32.6	2.2	2.87	6.25	36	37	47	40	18	68	2.8
201808351	宁德风	2	pah	1	1	1	12	64	0.0001	10	20.7612	1.7	60	6.46	3.96	119	5.48	0.69	0.22	199	37.9	7.94203	288.406	1.74725	1580.46	41.35	168	7.494	80.1	37.6	28.8	3.2	0.51	3.29	37	19	45	31	16	68	2.59
201823723	许兆才	1	pah	1	1	1	8	83	1600	3	19.5312	1.6	50	8.02	4.77	143	6.75	0.52	0.67	223	29.9	12.9808	428.846	8.69712	2894.71	32.5	130	7.415	71.6	39.1	25	2	0.33	6.08	37	23	48	30	17	68	2.89
201831262	季良寿	1	pah	1	1	1	10	73	400	10	23.3355	1.63	62	11.77	4.41	142	9.56	1.32	0.81	219	41	7.24242	165.909	5.86636	1586.09	47.6	67	7.455	75.3	41.7	29.3	0.8	0.59	5.44	38	25	45	33	20	66	2.66
201870936	孙兆余	1	pah	1	1	1	7	80	600	10	26.0933	1.74	79	13.44	5.23	159	12.03	0.67	0.72	164	44	17.9552	244.776	12.9278	2944.66	47.35	337	7.447	56.9	36.7	25.3	1.3	0.38	3.48	38	29	42	27	17	67	2.89
201718798	戴琛	1	pah	1	1	1	5	76	1000	5	25.9516	1.7	75	5.63	4.61	133	3.59	1.27	0.43	180	42.2	2.82677	141.732	1.21551	508.819	48.55	28	7.364	94.5	36.7	20.9	2.2	3.42	2.89	39	24	45	35	17	66	2.7
201853881	万守刚	1	pah	1	2	1	9	77	500	10	21.1327	1.82	70	6.84	4.28	133	5.83	0.7	0.3	216	38.5	8.32857	308.571	2.49857	1798.97	42	31	7.423	90.1	34.2	22.3	1.3	0.75	5.68	39	30	44	32	19	68	2.81
201831811	李尚琴	2	pah	1	1	1	7	65	200	40	16.6493	1.55	40	6.75	4.29	133	3.92	1.6	0.59	210	41.7	2.45	131.25	1.4455	514.5	49.7	61	7.364	72.2	40.2	22.9	1.6	0.22	3.32	40	34	34	31	18	68	2.75
201771094	牛化文	1	pah	1	1	1	6	67	600	10	18.1252	1.71	53	5.38	4.8	143	3.76	0.93	0.62	147	41.3	4.04301	158.065	2.50667	594.323	45.95	124	7.375	98.8	65	38	1.5	0.12	2.67	41	23	41	31	18	67	2.83
201771519	徐祝华	1	pah	1	2	2	4	66	800	10	25.3444	1.65	69	6.8	4.45	133	4.44	1.43	0.61	133	48.5	3.1049	93.007	1.89399	412.951	55.65	10	7.438	72.8	42.9	29	2.7	0.29	3.29	41	28	48	34	17	70	2.8
201771874	蒋庆山	1	pah	1	1	1	8	68	800	10	20.202	1.65	55	8.31	5.37	158	6.44	0.86	1	199	39.5	7.48837	231.395	7.48837	1490.19	43.8	38	7.459	73	37.6	26.7	1.1	0.22	5.15	41	24	41	31	14	68	2.78
201839969	厉荣	2	pah	1	1	1	6	68	0.0001	7	15.5709	1.7	45	11.37	4.88	142	9.34	1.17	0.75	243	39.3	7.98291	207.692	5.98718	1939.85	45.15	140	7.423	74.1	42.9	28	1.5	0.36	6.38	41	19	36	26	13	68	2.81
201868221	杨同安	1	pah	2	2	1	7	73	1000	10	23.8751	1.65	65	8.97	4.06	125	7.52	0.85	0.48	168	37.2	8.84706	197.647	4.24659	1486.31	41.45	61	7.442	61.5	43.4	29.6	1.1	0.68	6.78	41	30	46	27	18	68	2.8
2019031026	罗光华	1	pah	1	2	1	11	78	300	8	29.2969	1.6	75	11.56	5.22	152	9.19	1.52	0.73	177	36.1	6.04605	116.447	4.41362	1070.15	43.7	115	7.427	71.9	41.2	27.1	1.3	0.71	7.35	41	30	48	34	20	66	3
201712095	孔令军	1	pah	1	1	1	7	72	500	20	22.7903	1.74	69	7.31	4.04	118	5.67	1.03	0.6	220	35.1	5.50485	213.592	3.30291	1211.07	40.25	158	7.347	107	61	33.4	2.1	0.24	3.58	42	23	47	32	16	65	2.8
201806953	孙兆鹤	1	pah	1	1	1	8	73	1600	3	23.9361	1.57	59	7.55	3.8	118	6.01	0.92	0.57	231	38.6	6.53261	251.087	3.72359	1509.03	43.2	152	7.454	97	38.9	27.2	1.1	0.22	4.82	42	27	41	34	18	69	2.81
201886712	华占奎	1	pah	2	1	1	6	83	0.0001	20	23.8751	1.65	65	8.68	3.29	110	6.65	1.26	0.67	185	34.5	5.27778	146.825	3.53611	976.389	40.8	647	7.449	106	41.1	28.5	1.7	0.81	4.38	42	29	47	32	17	68	2.87
2018109215	宋井芳	2	pah	1	1	2	8	82	0.0001	30	32.0312	1.6	82	6.86	4.31	127	4.69	1.5	0.54	146	38.6	3.12667	97.3333	1.6884	456.493	46.1	97	7.352	112	52.2	28.9	1.6	0.72	3.64	42	26	40	31	18	68	2.9
2018111962	王俊生	1	pah	1	2	1	10	83	0	8	19.0311	1.7	55	11	4.33	136	8.38	1.5	0.81	242	28.7	5.58667	161.333	4.5252	1351.97	36.2	776	7.445	66.8	39.3	26.9	1.4	0.92	6.82	42	19	42	23	13	65	2.84
2019010470	赵桂英	2	pa h	2	1	1	6	66	0	4	24.974	1.55	60	7.93	4.82	155	5.71	1.46	0.7	153	40.1	3.91096	104.795	2.73767	598.377	47.4	351	7.444	54.2	37.3	25.5	1.5	0.29	3.79	42	29	45	29	16	68	2.8
2019011554	谢德富	1	pah	1	1	1	7	71	600	10	22.4913	1.7	65	10.41	4.36	135	7.88	1.55	0.84	248	35.1	5.08387	160	4.27045	1260.8	42.85	109	7.398	74.3	45.7	28.1	1.7	0.37	6.05	42	31	47	30	17	70	2.83
201714964	丁彭贵	1	pah	2	2	1	8	70	2000	30	24.4898	1.75	75	13.42	5.33	155	11.91	0.97	0.52	234	37.3	12.2784	241.237	6.38474	2873.13	42.15	128	7.465	77.9	50.9	36.6	1.1	2.25	6.34	43	28	46	28	17	68	2.89
201813355	丁中仁	1	pah	1	1	1	10	76	600	10	21.2245	1.75	65	15.15	5.17	144	14.55	0.24	0.35	146	35.9	60.625	608.333	21.2188	8851.25	37.1	559	7.461	73.1	29.9	21.3	3.4	1.01	6.68	43	32	50	30	17	68	2.9
201837636	毛順科	1	pah	2	1	1	8	69	1000	5	25.3906	1.6	65	7.86	5	112	5.84	1.48	0.34	318	34.7	3.94595	214.865	1.34162	1254.81	42.1	105	7.359	68.1	57.8	32.5	1.7	2.12	4.2	43	17	35	21	12	68	2.87
201878781	朱从华	1	pah	2	2	1	9	76	100	10	22.8374	1.7	66	7.95	4.36	130	6.58	0.91	0.39	201	35.4	7.23077	220.879	2.82	1453.38	39.95	2038	7.387	129	52.5	31.5	0.9	0.53	3.67	43	42	47	43	17	61	3.17
201889242	何玉珍	2	pah	1	2	1	10	59	0.0001	20	27.0552	1.55	65	12.39	5.3	140	11.73	0.45	0.19	229	36.6	26.0667	508.889	4.95267	5969.27	38.85	1033	7.331	54.5	80.8	42.6	1.4	1.1	4.13	43	34	40	30	17	66	3.09
2019032031	谢德富	1	pah	1	1	1	8	71	600	10	24.5675	1.7	71	13.96	4.63	143	11.77	1.34	0.74	278	38.9	8.78358	207.463	6.49985	2441.84	45.6	39	7.395	61.3	50.3	30.7	1.7	0.25	6.62	43	23	40	20	16	68	3.16
201833862	谷以珍	2	pah	1	2	1	3	86	0.0001	20	17.2584	1.56	42	5.25	4.22	130	4.2	0.69	0.33	259	44.2	6.08696	375.362	2.0087	1576.52	47.65	185	7.348	128	48	26.4	1.5	0.29	4.31	44	27	35	30	16	68	2.9
2019005060	韩茂祥	1	pah	2	1	1	7	82	800	10	32.6531	1.75	100	5.17	5.7	179	3.69	0.68	0.49	110	37.8	5.42647	161.765	2.65897	596.912	41.2	3217	7.281	81.3	57.3	27	2.1	1.28	2.73	44	31	48	42	23	60	2.94
2019041766	李虎生	1	pa h	1	1	1	13	68	1000	10	17.3589	1.78	55	15.78	3.79	113	14.59	0.6	0.48	169	29.7	24.3167	281.667	11.672	4109.52	32.7	290	7.424	72.5	45.7	29.9	2.5	0.42	7.02	44	22	38	31	17	66	2.92
201796791	张廷国	1	pah	2	1	1	13	72	600	20	20.7612	1.7	60	3.92	4.8	134	2.88	0.49	0.47	135	31.6	5.87755	275.51	2.76245	793.469	34.05	3671	7.425	46.5	66.3	43.5	2.2	0.48	2.68	46	29	49	43	18	55	4.46
201886589	于洪昌	1	pah	1	1	1	14	70	600	20	17.1468	1.62	45	19.3	4.74	133	16.72	0.87	1.43	186	36	19.2184	213.793	27.4823	3574.62	40.35	162	7.424	92.9	51.1	33.4	1	0.38	5.52	46	26	42	29	16	68	3.01
2018102681	郝敏达	1	pah	1	1	1	10	81	0.0001	10	18.937	1.78	60	5.03	3.35	106	3.71	0.76	0.4	202	31.3	4.88158	265.789	1.95263	986.079	35.1	3010	7.462	67.9	37.6	26.8	1.9	1.63	5.64	46	22	36	28	18	68	2.86
2018107463	夏广付	1	pah	1	1	1	10	67	600	5	25.5102	1.68	72	10.73	4.62	137	6.5	1.85	0.76	306	33.5	3.51351	165.405	2.67027	1075.14	42.75	332	7.437	83.1	38.3	25.8	1.8	0.39	4.62	46	32	51	30	18	60	3.01
201716862	邹开发	1	pah	2	1	1	8	70	800	10	27.7575	1.85	95	5.47	6.11	174	3.71	1.15	0.51	111	40.7	3.22609	96.5217	1.6453	358.096	46.45	1286	7.364	59.1	66.2	37.7	1.6	0.77	8.53	47	28	48	40	25	65	3.06
201809726	董松铭	1	pah	2	1	1	9	79	2000	10	22.4913	1.7	65	6.01	4.26	126	5.7	0.21	0.09	169	37.7	27.1429	804.762	2.44286	4587.14	38.75	1344	7.356	100	48.4	27	1.2	0.37	5.66	47	30	42	28	17	68	3.07
201888146	方玉华	1	pah	2	1	1	8	82	1000	10	24.7676	1.62	65	7.21	4.01	116	5.2	1.08	0.63	540	27.5	4.81481	500	3.03333	2600	32.9	1210	7.396	61.7	44.9	27.6	3	1.25	6.96	47	32	52	35	16	68	3.08
201893287	季丰	1	pah	1	2	1	8	63	1000	8	29.0318	1.66	80	8.03	4.85	147	5.26	2.13	0.43	332	41.1	2.46948	155.869	1.06188	819.869	51.75	653	7.374	85.3	45.9	26.7	1.6	1.32	4.79	47	25	39	26	15	65	3.03
201900917	夏前柱	1	pah	1	1	2	6	79	900	10	18.0802	1.56	44	7.75	3.53	109	6.26	1.14	0.28	219	35.8	5.49123	192.105	1.53754	1202.58	41.5	858	7.392	171	46.1	28	1.1	0.48	3.94	47	32	36	34	12	68	3.04
2018114122	嵇军	1	pah	1	1	1	10	63	1600	10	24.974	1.55	60	8.58	4.52	140	7.48	0.65	0.42	216	43.8	11.5077	332.308	4.83323	2485.66	47.05	1102	7.426	89.4	46.1	32.1	2.1	0.62	4	47	19	35	26	14	65	3.05
201813736	翟建华	1	pah	2	2	2	15	78	800	10	27.6817	1.7	80	12.21	5.39	160	11.01	0.79	0.33	177	38.7	13.9367	224.051	4.59911	2466.8	42.65	384	7.45	79.5	30.6	21.3	2.2	0.47	5.18	48	31	40	30	20	68	3.09
201825264	陶长荣	1	pah	1	2	1	10	70	400	15	23.9869	1.78	76	8.19	5.02	151	5.99	1.18	0.52	115	40	5.07627	97.4576	2.63966	583.771	45.9	22	7.367	109	47.7	27.4	1.5	0.42	4.08	48	29	42	29	17	68	3.06
2019005076	吴立志	1	pa h	1	1	1	9	79	0	10	15.5709	1.7	45	6.97	3.83	114	4.55	0.92	0.57	336	24.9	4.94565	365.217	2.81902	1661.74	29.5	1195	7.461	171	49.6	35.4	2.2	2.58	6.3	48	24	34	22	17	60	3.08
2019007509	杨广前	1	pah	1	1	1	9	76	600	40	22.0386	1.65	60	12.5	3.86	97	9.98	1.34	1.08	617	27.2	7.44776	460.448	8.04358	4595.27	33.9	806	7.453	97.1	42.4	29.7	1.9	2.11	9.25	48	29	45	36	18	65	3.1
2019005962	杨开东	1	pa h	1	2	1	4	79	1000	10	30.8463	1.66	85	7.34	3.65	118	5.37	1.1	0.63	115	38.8	4.88182	104.545	3.07555	561.409	44.3	167	7.409	112	46.3	29.3	1.1	0.5	6.47	49	37	50	36	19	70	3.14
201793804	盛良廷	1	pah	2	1	2	8	71	1500	10	22.8931	1.81	75	9.75	4.94	139	8.71	0.57	0.41	139	44.7	15.2807	243.86	6.26509	2124.02	47.55	63	7.313	33.2	77.9	39.4	1.9	0.17	3.52	50	31	48	37	17	67	3.09
201844004	张宪永	1	pah	1	1	1	7	82	1000	5	22.4913	1.7	65	6.9	4.5	140	4.41	1.95	0.44	202	41.5	2.26154	103.59	0.995077	456.831	51.25	178	7.418	81.5	42.3	27.3	1.4	0.65	3.18	50	24	41	26	14	67	3.15
201891618	周长美	1	pah	1	1	1	10	70	1000	10	17.5781	1.6	45	12.64	5.17	160	8.73	2.7	1.06	216	32.6	3.23333	80	3.42733	698.4	46.1	242	7.433	79.3	43.4	29	1.6	0.22	4.13	51	25	39	27	16	66	3.4
2018104880	朱正风	2	pah	2	1	1	8	64	0.0001	10	20.9572	1.62	55	5.61	4.3	127	4.51	0.67	0.42	163	31.6	6.73134	243.284	2.82716	1097.21	34.95	2700	7.364	34.9	75.1	42.8	2	2.2	3.31	51	32	46	34	17	68	3.22
2019034796	颜崇贵	1	pa h	1	2	2	8	72	800	10	16.7311	1.64	45	9.32	2.69	87	7.36	1.17	0.73	284	31.5	6.2906	242.735	4.59214	1786.53	37.35	646	7.431	82.7	35.8	23.8	1.1	0.59	7.21	51	30	44	36	20	69	3.19
2019035717	胡同语	1	pa h	2	1	1	5	71	1000	10	27.1809	1.65	74	7.33	5	161	5.53	1.08	0.68	130	38.7	5.12037	120.37	3.48185	665.648	44.1	3781	7.312	59.6	85.7	43.3	1.9	1.79	3.42	51	25	40	38	24	66	3.2
201827593	张乃航	1	pah	2	2	1	9	77	1200	10	19.0311	1.7	55	4.68	4.19	130	2.53	1.1	0.47	205	39.5	2.3	186.364	1.081	471.5	45	344	7.414	65.9	50.1	32	0.8	1.97	2.99	52	35	44	39	19	68	3.26
201863051	王树清	1	pah	1	1	1	7	74	1000	10	18.5078	1.66	51	7.9	4.27	133	6.41	0.75	0.71	152	40.1	8.54667	202.667	6.06813	1299.09	43.85	290	7.422	69.3	50.7	33	0.9	1.95	6.39	53	27	44	39	20	68	3.28
2019014830	徐天植	1	pa h	1	1	1	10	73	600	10	27.4286	1.75	84	6.59	3.65	113	4.85	0.97	0.66	204	31.2	5	210.309	3.3	1020	36.05	256	7.434	79.2	36.6	24.5	0.9	2.45	7.16	53	29	42	30	17	66	3.26
201816649	朱从华	1	pah	2	2	1	9	75	800	10	23.8754	1.7	69	9.47	4.42	137	7.49	0.95	0.99	113	32.5	7.88421	118.947	7.80537	890.916	37.25	171	7.4	50	52.6	32.6	0.9	7.06	8.69	54	50	46	48	26	62	3.39
201831834	陈克寅	1	pah	1	2	2	7	79	1000	50	24.2215	1.7	70	9.52	4.13	125	8.05	0.85	0.48	138	39.3	9.47059	162.353	4.54588	1306.94	43.55	887	7.41	117	43.8	27.7	1.8	1.2	4.24	54	33	55	36	18	68	3.33
201836436	韩玉兰	2	pah	1	1	1	10	77	0.0001	30	24.974	1.55	60	21.19	4.3	124	18	1.31	1.85	308	35.7	13.7405	235.115	25.4198	4232.06	42.25	1275	7.43	138	47.6	31.5	2	0.46	6.38	54	30	47	34	20	65	3.32
201852972	王必桂	1	pah	2	1	1	5	74	1000	10	23.2254	1.66	64	9.19	5.41	163	7.52	0.71	0.67	223	35.1	10.5915	314.085	7.09634	2361.92	38.65	767	7.354	43.4	66.5	37	2.3	0.51	6.31	54	29	41	43	21	59	3.33
201862917	魏从德	1	pah	2	1	1	10	52	1000	5	17.7154	1.68	50	8.32	5.71	154	7.91	0.27	0.11	213	36.5	29.2963	788.889	3.22259	6240.11	37.85	3858	7.363	97.4	56.3	32	1.7	0.47	4.75	54	24	41	39	17	68	3.54
201834247	李超	1	pah	1	1	1	15	64	1500	10	15.625	1.6	40	9.48	4.51	143	7.63	0.58	1.09	232	39.2	13.1552	400	14.3391	3052	42.1	160	7.45	97.9	49	34.1	2.2	2.94	8.87	55	27	43	32	16	68	3.34
2019028506	徐兆垠	1	pa h	2	2	2	16	72	1000	10	21.9713	1.72	65	4.05	4.7	137	2.56	1.03	0.3	136	41.2	2.48544	132.039	0.745631	338.019	46.35	258	7.348	79.4	70.5	38.8	1.7	0.46	3.77	55	24	37	38	20	68	3.37
201825232	胡建华	1	pah	1	2	2	10	64	600	20	29.7576	1.66	82	7.83	5.5	166	6.02	1.08	0.58	173	43.3	5.57407	160.185	3.23296	964.315	48.7	2926	7.329	73.1	77.7	40.8	1.4	0.27	2.99	57	25	51	43	29	68	3.43
201890372	唐志成	1	pah	2	1	1	6	62	1000	10	23.0469	1.6	59	11.04	4.31	132	8.17	1.81	0.92	322	36.7	4.51381	177.901	4.15271	1453.45	45.75	73	7.394	52.4	63	38.5	2.4	0.25	5.23	57	25	45	28	16	66	3.62
201899172	胡建华	1	pah	2	2	2	12	63	600	20	25.9516	1.7	75	7.16	5.15	156	5.98	0.65	0.41	185	43.5	9.2	284.615	3.772	1702	46.75	1250	7.3	140	82	40.4	1.7	0.22	2.94	57	34	54	45	30	66	3.47
201714627	戴新祥	1	pah	2	2	1	23	82	600	10	22.0386	1.65	60	5.79	3.56	88	4.59	0.82	0.33	263	35	5.59756	320.732	1.8472	1472.16	39.1	302	7.394	172	63.1	38.5	1	0.55	3.94	58	25	47	39	20	68	3.45
201779222	王玉林	1	pah	2	2	1	8	86	800	10	25	1.6	64	7.16	4.51	129	5.18	0.79	0.52	227	37.6	6.55696	287.342	3.40962	1488.43	41.55	658	7.362	259	58.7	33.3	0.7	0.36	3.36	58	26	43	31	18	68	3.46
201773662	高玉德	1	pah	2	2	1	10	68	600	20	24.2215	1.7	70	6.84	4.62	137	4.65	0.91	1.01	204	39.5	5.10989	224.176	5.16099	1042.42	44.05	88	7.414	55.9	58.4	37.4	1.2	0.41	6.7	59	22	43	34	15	67	3.5
201891308	陈耀兰	2	pah	2	1	1	7	78	200	10	22.8928	1.55	55	10.22	4.11	123	8.54	0.65	1.03	179	36.1	13.1385	275.385	13.5326	2351.78	39.35	4942	7.358	47.5	75.3	42.3	2.2	1.38	3.06	60	30	38	31	23	67	3.53
2019037061	张廷国	1	pa h	2	2	1	9	74	800	10	22.8571	1.75	70	5.53	4.38	128	4.3	0.69	0.4	86	35.7	6.23188	124.638	2.49275	535.942	39.15	4179	7.37	59.5	57.8	33.4	1.6	0.24	3.11	61	34	46	41	20	65	3.57
2019042578	江其亮	1	pa h	2	1	1	8	85	200	40	25.4028	1.66	70	7.43	3.54	114	5.77	0.8	0.83	163	31	7.2125	203.75	5.98637	1175.64	35	7204	7.416	58.4	67.6	43.5	1.1	0.52	2.31	61	28	45	36	31	62	3.57
201812634	刘海香	2	pah	2	2	1	10	64	0.0001	20	22.2222	1.5	50	18.74	4.65	129	15.43	1.45	1.77	308	32.6	10.6414	212.414	18.8352	3277.54	39.85	8827	7.397	40.1	73.5	45.2	2.8	2.81	5.6	62	24	39	30	18	65	3.6
2019023512	赵秀兰	2	pa h	2	1	1	10	74	0	10	29.2969	1.6	75	12.67	3.97	117	10.94	0.87	0.72	212	34	12.5747	243.678	9.05379	2665.84	38.35	3769	7.331	94.6	72	38	0.9	2.4	3.68	62	34	54	32	19	59	3.62
201715662	朱士才	1	pah	2	2	1	21	78	800	30	24.7409	1.67	69	11.61	4.51	122	9.01	1.67	0.68	269	32.7	5.39521	161.078	3.66874	1451.31	41.05	191	7.505	57.5	37.3	29.4	1.2	2.57	8.83	63	32	46	36	19	66	3.65
201714603	王玉	1	pah	2	1	1	11	65	600	20	19.7777	1.59	50	11.18	4.27	120	10.45	0.39	0.33	165	37	26.7949	423.077	8.84231	4421.15	38.95	1350	7.397	66.3	61.9	38.1	3.1	0.31	5.7	65	29	48	34	18	68	3.72
201787395	高玉花	2	pah	2	1	1	10	78	0.0001	20	25.3906	1.6	65	7.12	5.31	152	5.36	1.26	0.45	171	28.7	4.25397	135.714	1.91429	727.429	35	1093	7.378	76.8	72.1	42.4	0.8	10.56	2.42	65	29	45	48	24	65	3.72
201851474	韩国报	1	pah	1	1	1	6	67	800	10	25.9516	1.7	75	5.39	4.48	143	4.04	0.74	0.48	186	42.8	5.45946	251.351	2.62054	1015.46	46.5	1382	7.399	77.1	47.8	29.6	1.4	0.27	3.16	65	34	61	32	19	68	3.71
201876658	张桂花	2	pah	2	1	1	6	81	0.0001	20	25.3906	1.6	65	8.5	4.11	121	6.45	1.29	0.55	183	39.4	5	141.86	2.75	915	45.85	814	7.342	30.9	67.1	36.3	1.9	1.01	3.06	66	28	49	33	15	68	3.77
201783114	陈志桂	1	pah	2	2	1	15	77	800	20	22.3081	1.64	60	7.18	6.26	169	5.58	0.91	0.57	155	33.6	6.13187	170.33	3.49516	950.44	38.15	3666	7.363	36.2	60.1	34.2	2.4	1.33	2.28	67	23	46	45	29	60	3.79
201901032	余金成	1	pa h	2	1	1	11	72	800	10	17.8565	1.69	51	11.7	4.44	139	10.7	0.45	0.52	99	28.4	23.7778	220	12.3644	2354	30.65	418	7.397	101	58.7	36	0.9	5.13	1.13	67	24	37	31	17	68	3.78
201839858	何玉珍	2	pah	2	2	1	8	60	0.0001	10	25.3906	1.6	65	8.21	5.15	138	5.88	1.54	0.74	265	37.1	3.81818	172.078	2.82545	1011.82	44.8	2257	7.35	29.4	81.5	47.9	1.7	0.93	3.77	68	34	37	37	17	69	3.82
201876029	陈传宁	1	pah	2	1	1	8	66	400	10	22.8571	1.75	70	6.38	6.09	176	4.05	1.39	0.7	240	34.2	2.91367	172.662	2.03957	699.281	41.15	1839	7.395	51.5	38.4	23.5	2	0.41	2.64	71	28	30	43	35	65	3.91
2019018508	潘兴章	1	pa h	2	1	1	10	65	800	30	20.7612	1.7	60	8.15	4.28	134	7.63	0.39	0.12	149	36.5	19.5641	382.051	2.34769	2915.05	38.45	1209	7.327	92.3	77.8	40.7	0.9	0.91	5.38	71	33	45	34	19	68	3.91
201840818	吉同美	1	pah	2	2	1	14	65	1600	10	22.4059	1.65	61	7.56	3.07	121	6.04	0.95	0.36	212	49.1	6.35789	223.158	2.28884	1347.87	53.85	625	7.371	46.9	41	23.7	4.1	0.2	2.08	72	35	51	36	17	68	3.94
2019008559	翁寿春	1	pa h	1	1	1	4	79	500	8	24.2215	1.7	70	7.55	4	129	6.7	0.48	0.29	233	33.6	13.9583	485.417	4.04792	3252.29	36	263	7.474	82.5	40.4	29.6	1.2	1.85	7.48	72	28	39	38	16	68	3.94
201710995	伏培松	1	pah	2	2	1	7	77	800	10	19.0311	1.7	55	7.57	4.95	138	5.97	0.97	0.56	230	32.4	6.15464	237.113	3.4466	1415.57	37.25	1337	7.375	68.3	62.9	36.7	0.7	2.01	3.8	77	25	43	35	17	68	4.1
201781428	牛庆兰	2	pah	2	1	1	10	77	0.0001	20	23.634	1.58	59	4.97	4.97	141	4.41	0.29	0.26	143	34.6	15.2069	493.103	3.95379	2174.59	36.05	9079	7.386	33.2	61.6	36.9	2.5	1.26	1.68	78	26	45	35	18	66	4.1
201794704	许建中	1	pah	1	2	1	6	67	800	30	15.5709	1.7	45	7.89	3.57	114	6.85	0.4	0.63	154	32.9	17.125	385	10.7888	2637.25	34.9	818	7.473	80.2	54.7	40.1	1.4	0.3	4.47	81	24	35	23	16	61	4.21
201834477	刘兰礼	2	pah	2	1	1	16	75	0.0001	20	26.8386	1.58	67	12.27	4.31	125	11.04	0.45	0.74	193	34.1	24.5333	428.889	18.1547	4734.93	36.35	1129	7.351	63.9	55.7	30.8	1.8	10.53	12.15	83	35	48	30	18	66	4.28
201803660	梁兆斌	1	pah	2	1	1	10	73	400	30	19.5312	1.6	50	7.53	5.08	147	6.78	0.23	0.5	113	36.2	29.4783	491.304	14.7391	3331.04	37.35	6979	7.363	94.6	75.7	43.1	1.2	1.25	3.4	84	30	36	53	34	65	4.3
201821052	张兆英	1	pah	2	2	2	11	82	600	30	15.625	1.6	40	4.8	3.96	122	3.51	0.75	0.49	205	26.8	4.68	273.333	2.2932	959.4	30.55	401	7.49	60.2	46.4	35.4	1.4	1.69	5.72	85	35	41	35	18	66	4.32
201900908	刘跃兰	2	pah	1	1	1	7	67	0.0001	20	24.7676	1.62	65	4.77	3.92	120	3.1	1.12	0.38	108	36.4	2.76786	96.4286	1.05179	298.929	42	4300	7.434	45.9	33.1	22.2	1	0.2	3.63	86	43	51	33	17	68	4.42
201883602	张兰生	2	pah	1	1	1	10	76	0.0001	40	16.6493	1.55	40	5.2	5.1	152	4.11	0.63	0.41	212	36.4	6.52381	336.508	2.67476	1383.05	39.55	5232	7.306	40.4	66.4	33.1	2.5	1.6	2.4	89	29	46	52	27	68	4.45
201812232	袁月兰	2	pah	1	1	1	12	80	0.0001	20	21.6311	1.58	54	8.56	4.95	152	6.95	0.91	0.68	141	43.1	7.63736	154.945	5.19341	1076.87	47.65	71	7.453	75.6	43.8	30.7	1.4	1.04	4.31	91	29	36	41	32	65	4.52
201829315	夏颖	2	pah	2	1	1	8	48	0.0001	20	15.5556	1.5	35	2.82	4.07	84	2.05	0.44	0.3	128	36.8	4.65909	290.909	1.39773	596.364	39	7176	7.364	43.5	68.8	39.2	2.4	5.58	1.95	105	34	44	43	34	65	4.87
201853307	唐善章	1	pah	2	1	1	7	52	400	10	23.5102	1.75	72	8.73	5.69	165	6.73	1.39	0.49	328	33.7	4.84173	235.971	2.37245	1588.09	40.65	473	7.384	51	59.9	35.7	1.1	0.81	4.94	106	24	35	44	35	60	4.9
201869508	颜世茂	1	pah	2	2	1	12	54	800	10	29.5369	1.84	100	6.75	5.11	141	6.26	0.39	0.13	156	39.3	16.0513	400	2.08667	2504	41.25	4560	7.446	60.5	33.9	23.4	1.8	0.81	5.9	108	30	47	42	26	68	4.96
201856746	王开红	2	pah	2	1	1	8	68	0.0001	40	18.7305	1.55	45	6.34	5.58	125	5.16	0.66	0.44	209	26.5	7.81818	316.667	3.44	1634	29.8	5144	7.391	38.3	60.9	36.9	2.4	1.37	3.73	128	31	35	51	29	65	5.45
2019023864	浦建举	1	pa h	2	1	1	15	80	1600	20	18.3655	1.65	50	16.32	4.49	142	15.43	0.31	0.55	176	37	49.7742	567.742	27.3758	8760.26	38.55	5488	7.523	68	57.4	47.1	3.4	0.28	4.26	131	22	35	34	22	60	5.5
		1=male		1=no	1=no	1=no
		2=female		2=yes	2=yes	2=yes
